# Supplementary material for: Characteristics of traumatic brain injury models: from macroscopic blood flow changes to microscopic mitochondrial changes
Source: PubMed Central journal article supplement — Neural Regen Res. 2023 Mar 3;18(10):2268–77. doi: 10.4103/1673-5374.369125 (PMC10328283; doi:10.4103/1673-5374.369125), 2023-03-03
Supplement: NRR-18-2268_Suppl1.pdf [file NRR-18-2268_Suppl1.pdf]

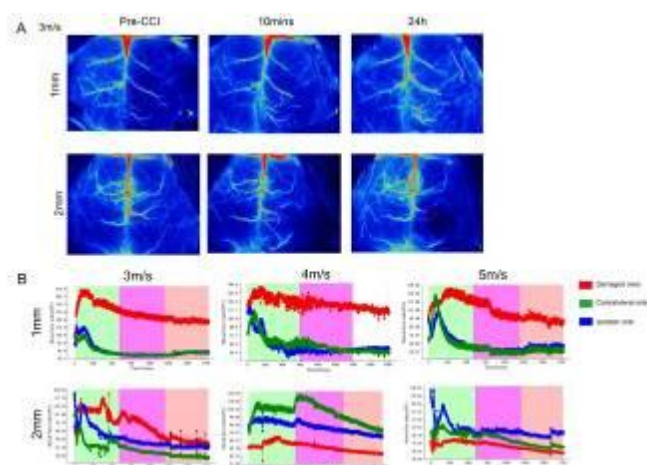

**Additional Figure 1 Cerebral blood perfusion changes in CCI model detected by laser speckle imager.**

(A) Whole-cerebral surface blood perfusion in the 1 mm (3 m/s) and 2 mm (3 m/s) groups at baseline, 10 minutes and 24 hours after injury. (B) blood flow changes in the 1 mm (3 m/s) and 2 mm (3 m/s), 1 mm (4 m/s) and 2 mm (4 m/s), 1 mm (5 m/s), and 2 mm (5 m/s) groups within 30 minutes after injury. Red: injury area; green: opposite side of injury area; blue: ipsilateral to injury area. CCI: Controlled cortical impingement.
