# Supplementary material for: Characteristics of traumatic brain injury models: from macroscopic blood flow changes to microscopic mitochondrial changes
Source: PubMed Central journal article supplement — Neural Regen Res. 2023 Mar 3;18(10):2268–77. doi: 10.4103/1673-5374.369125 (PMC10328283; doi:10.4103/1673-5374.369125), 2023-03-03
Supplement: NRR-18-2268_Suppl5.pdf [file NRR-18-2268_Suppl5.pdf]

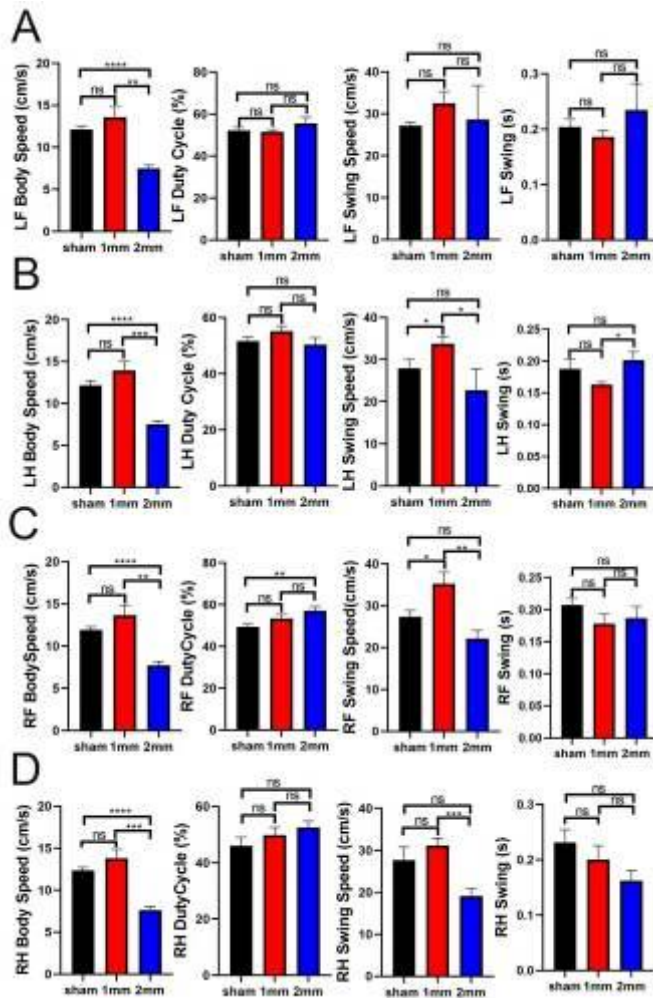

**Additional Figure 5 Dynamic parameters of the sham, 1 mm, and 2 mm groups under the condition of 4 m/s.**

(A-D) The body speed, duty cycle, swing speed, and swing in the left forefoot (LF; A), left hindfoot (LH; B), right forefoot (RF; C), and right hindpaw (RH; D). Sham, n = 8; 1 mm (3 m/s), n = 8; 2 mm (3 m/s), n = 6; 1 mm (4 m/s), n = 8; 2 mm (4 m/s), n = 6; 1 mm (5 m/s), n = 8; 2 mm (5 m/s), n = 7. The data are expressed as mean ± SEM. \* $P < 0.05$ , \*\* $P < 0.01$ , \*\*\* $P < 0.001$ , \*\*\*\* $P < 0.0001$  (one-way analysis of variance followed by Tukey's multiple comparisons test).
