# Supplementary material for: Characteristics of traumatic brain injury models: from macroscopic blood flow changes to microscopic mitochondrial changes
Source: PubMed Central journal article supplement — Neural Regen Res. 2023 Mar 3;18(10):2268–77. doi: 10.4103/1673-5374.369125 (PMC10328283; doi:10.4103/1673-5374.369125), 2023-03-03
Supplement: NRR-18-2268_Suppl7.pdf [file NRR-18-2268_Suppl7.pdf]

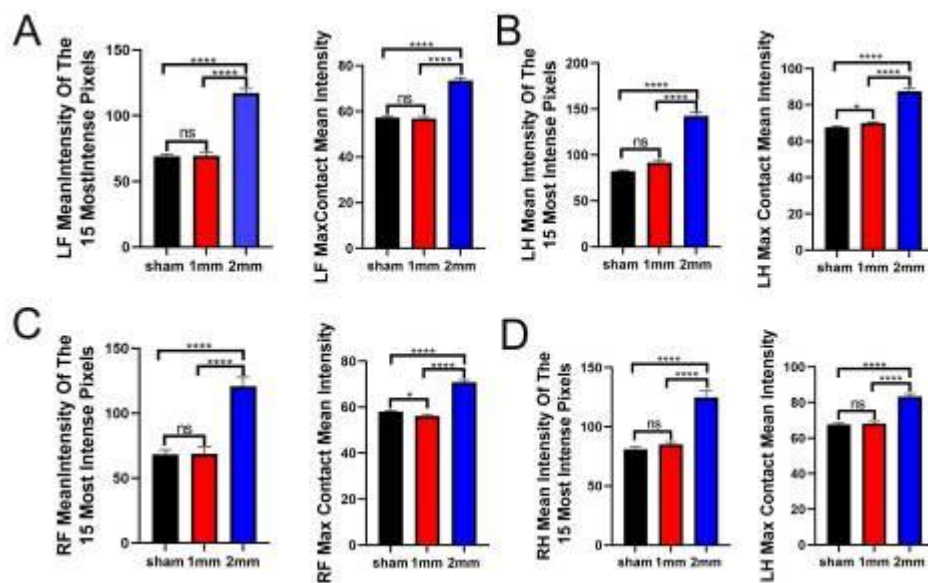

**Additional Figure 7** The paw strength of the sham, 1 mm, and 2 mm groups under the condition of 4 m/s.

(A-D) The statistical results of the mean intensity of the 15 most intense pixels and max contact mean intensity of the left forefoot (LF; A), left hindfoot (LH; B), right forefoot (RF; C), and right hindpaw (RH; D). Sham,  $n = 8$ ; 1 mm (3 m/s),  $n = 8$ ; 2 mm (3 m/s),  $n = 6$ ; 1 mm (4 m/s),  $n = 8$ ; 2 mm (4 m/s),  $n = 6$ ; 1 mm (5 m/s),  $n = 8$ ; 2 mm (5 m/s),  $n = 7$ . The data are expressed as mean  $\pm$  SEM.  $*P < 0.05$ ,  $****P < 0.0001$  (one-way analysis of variance followed by Tukey's multiple comparisons test).
