# Supplementary material for: Characteristics of traumatic brain injury models: from macroscopic blood flow changes to microscopic mitochondrial changes
Source: PubMed Central journal article supplement — Neural Regen Res. 2023 Mar 3;18(10):2268–77. doi: 10.4103/1673-5374.369125 (PMC10328283; doi:10.4103/1673-5374.369125), 2023-03-03
Supplement: NRR-18-2268_Suppl11.pdf [file NRR-18-2268_Suppl11.pdf]

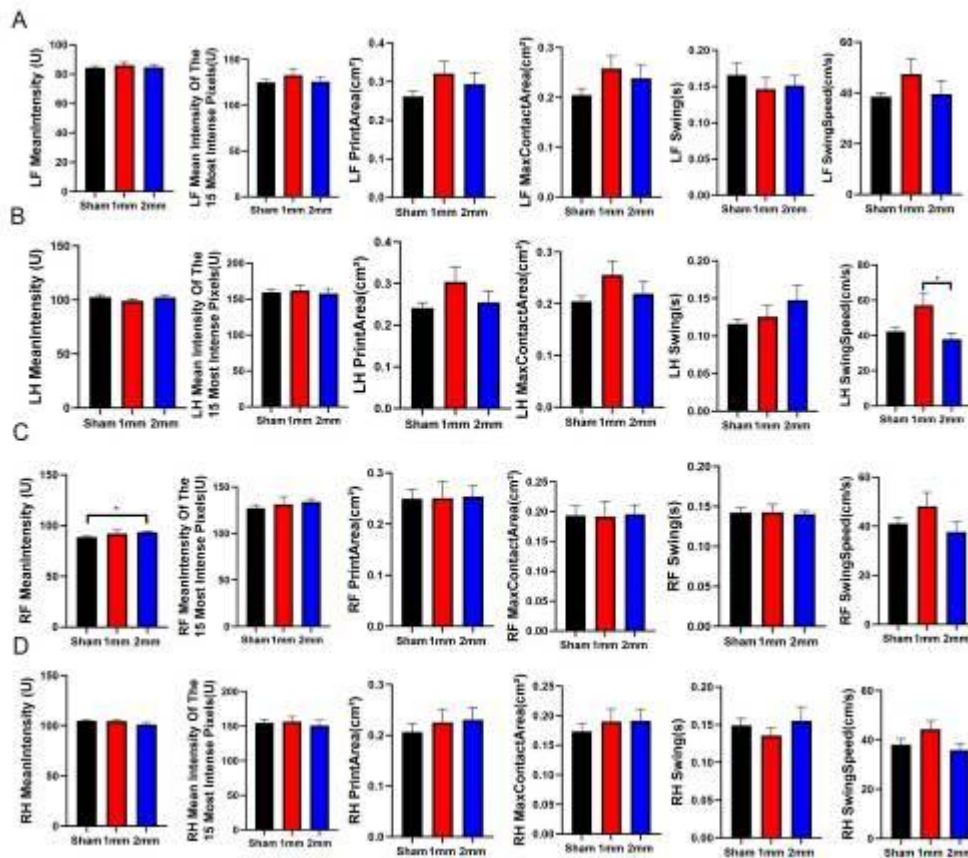

**Additional Figure 11** Gait analysis results of the sham, 1 mm, and 2 mm groups under the condition of 5 m/s on day 30.

(A-D) Mean intensity, mean intensity of the 15 most intense pixels, paw print area, maximum contact area, swing, swing speed in left forefoot (LF; A), left hind foot (LH; B), right forefoot (RF; C), right hind paw (RH; D). Sham, n = 8; 1 mm (5 m/s), n = 8; 2 mm (5 m/s), n = 7. The data are expressed as mean ± SEM. \**P* < 0.05 (one-way analysis of variance followed by Tukey's multiple comparisons test).
