# Supplementary material for: Characteristics of traumatic brain injury models: from macroscopic blood flow changes to microscopic mitochondrial changes
Source: PubMed Central journal article supplement — Neural Regen Res. 2023 Mar 3;18(10):2268–77. doi: 10.4103/1673-5374.369125 (PMC10328283; doi:10.4103/1673-5374.369125), 2023-03-03
Supplement: NRR-18-2268_Suppl13.pdf [file NRR-18-2268_Suppl13.pdf]

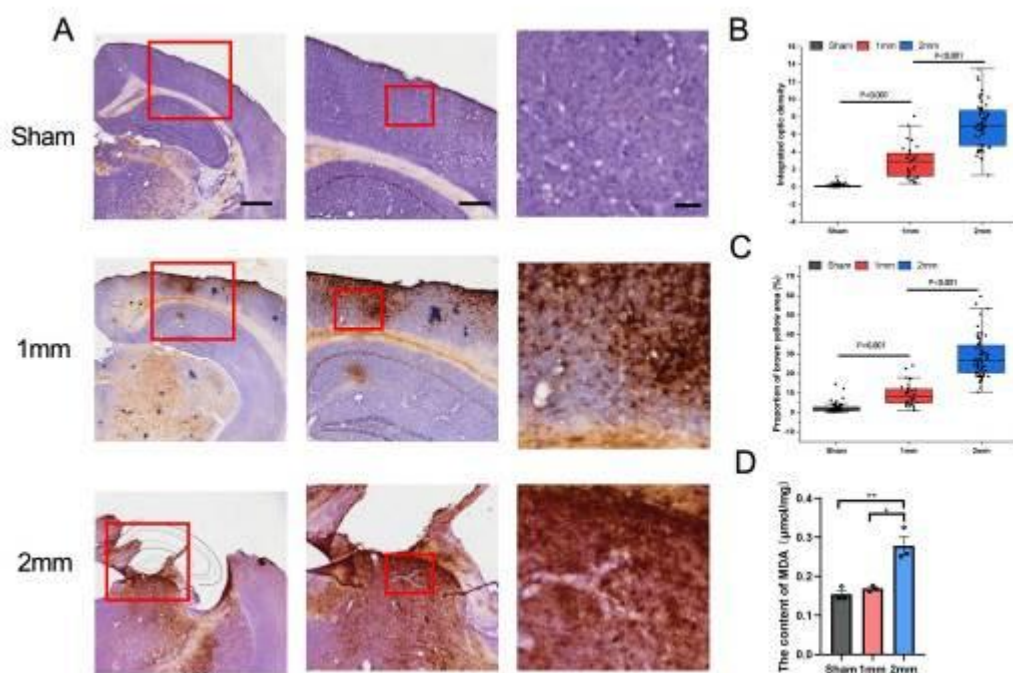

**Additional Figure 13: Representative Perl's iron staining images and MDA contents in brain tissue of the sham, 1 mm, and 2 mm groups under the condition of 5 m/s on day 30.**

(A) Representative images of Perl's iron staining. (B) Integrated optic density of perl's iron staining (sham  $n = 59$ , 1 mm  $n = 30$ , 2 mm  $n = 60$ ). (C) Proportion of brown yellow area of perl's iron staining (sham  $n = 59$ , 1 mm  $n = 30$ , 2 mm  $n = 60$ ). (D) Statistics of MDA content in the injured area in Sham group, 1 mm group and 2 mm group ( $n = 3$  for each group). The values are expressed in  $\mu\text{mol/mg}$  protein. The data are expressed as mean  $\pm$  SEM.  $*P < 0.05$ ,  $**P < 0.01$ ,  $***P < 0.001$  (one-way analysis of variance followed by Tukey's multiple comparisons test). MDA: Malondialdehyde.
