# Supplementary material for: Characteristics of traumatic brain injury models: from macroscopic blood flow changes to microscopic mitochondrial changes
Source: PubMed Central journal article supplement — Neural Regen Res. 2023 Mar 3;18(10):2268–77. doi: 10.4103/1673-5374.369125 (PMC10328283; doi:10.4103/1673-5374.369125), 2023-03-03
Supplement: NRR-18-2268_Suppl14.pdf [file NRR-18-2268_Suppl14.pdf]

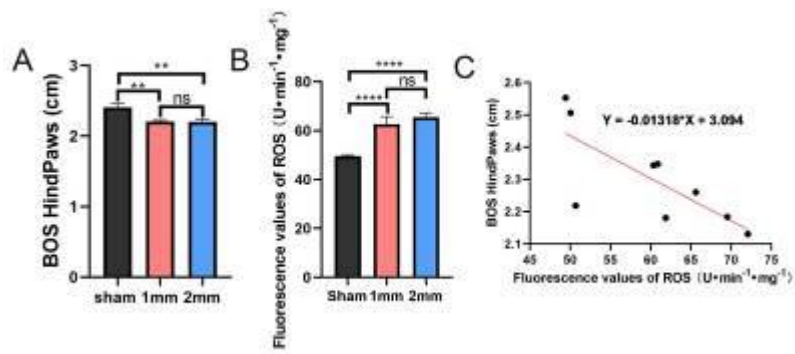

**Additional Figure 14 ROS contents in the sham, 1 mm, 2 mm groups under the condition of 5 m/s on day 7.**

(A) Hind paw support area (n = 8 for each group). (B) Reactive oxygen species content in brain tissue in the injured area (n = 3 for each group). (C) Correlation analysis between Base of Support (BOS) Hind paws and ROS contents in brain tissue (n = 9). ROS: reactive oxygen species.
