# Supplementary material for: Characteristics of traumatic brain injury models: from macroscopic blood flow changes to microscopic mitochondrial changes
Source: PubMed Central journal article supplement — Neural Regen Res. 2023 Mar 3;18(10):2268–77. doi: 10.4103/1673-5374.369125 (PMC10328283; doi:10.4103/1673-5374.369125), 2023-03-03
Supplement: NRR-18-2268_Suppl15.pdf [file NRR-18-2268_Suppl15.pdf]

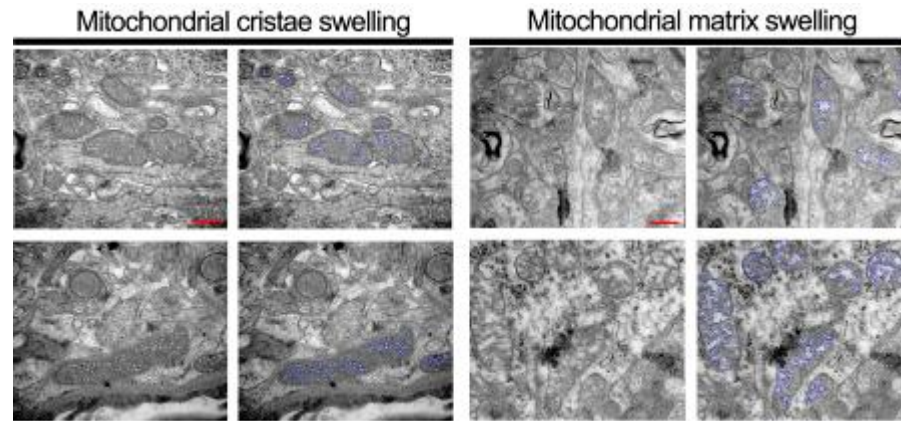

**Additional Figure 15 Representative transmission electron microscopic images of mitochondrial crista and mitochondrial matrix swelling.**

(A) mitochondrial crista swelling of the sham group. (B) Mitochondrial matrix swelling of the 2 mm group under the condition of 5 m/s. Scale bars: 500 nm.
