# Supplementary material for: Characteristics of traumatic brain injury models: from macroscopic blood flow changes to microscopic mitochondrial changes
Source: PubMed Central journal article supplement — Neural Regen Res. 2023 Mar 3;18(10):2268–77. doi: 10.4103/1673-5374.369125 (PMC10328283; doi:10.4103/1673-5374.369125), 2023-03-03
Supplement: NRR-18-2268_Suppl16.pdf [file NRR-18-2268_Suppl16.pdf]

Additional Table 2 Data statistics details

| Data             | Response variable           | Groups          | n define as | Animal used | Normality            | Homogeneity of variance test (Levene) | Hypothesis test            | Test value                                    | P-value                          | Summary |
|------------------|-----------------------------|-----------------|-------------|-------------|----------------------|---------------------------------------|----------------------------|-----------------------------------------------|----------------------------------|---------|
| Figure 1E left   | Blood Flow Index (U)        | 0:3m/s-1mm n=3  | Mouse       | 3 mice      | W=0.879 df=3 P=0.323 | F=3.098 df=4 p=0.153                  | Repeated measurement ANOVA | $F_{\text{between group}}=11.385$ df1=1 df2=4 | $P_{\text{between group}}=0.028$ | *       |
|                  |                             | 0:3m/s-2mm n=3  |             | 3 mice      | W=0.825 df=3 P=0.175 |                                       |                            | $F_{\text{within group}}=2.996$ df1=3 df2=12  | $P_{\text{within group}}=0.073$  |         |
|                  |                             | 10:3m/s-1mm n=3 |             | 3 mice      | W=0.933 df=3 P=0.500 | F=3.232 df=4 p=0.147                  |                            |                                               |                                  |         |
|                  |                             | 10:3m/s-2mm n=3 |             | 3 mice      | W=0.995 df=3 P=0.871 |                                       |                            |                                               |                                  |         |
|                  |                             | 20:3m/s-1mm n=3 |             | 3 mice      | W=0.973 df=3 P=0.683 | F=0.223 df=4 p=0.662                  |                            |                                               |                                  |         |
|                  |                             | 20:3m/s-2mm n=3 |             | 3 mice      | W=0.754 df=3 P=0.010 |                                       |                            |                                               |                                  |         |
|                  |                             | 30:3m/s-1mm n=3 |             | 3 mice      | W=0.995 df=3 P=0.866 | F=2.847 df=4 p=0.167                  |                            |                                               |                                  |         |
|                  |                             | 30:3m/s-2mm n=3 |             | 3 mice      | W=0.821 df=3 P=0.167 |                                       |                            |                                               |                                  |         |
| Figure 1E middle | Blood Flow Index (U)        | 0:4m/s-1mm n=3  | Mouse       | 3 mice      | W=0.750 df=3 P=0.000 | F=0.005 df=4 p=0.947                  | Friedman's M test          | $X^2=3$ df=1                                  | P=0.083                          | ns      |
|                  |                             | 0:4m/s-2mm n=3  |             | 3 mice      | W=0.907 df=3 P=0.407 |                                       |                            |                                               |                                  |         |
|                  |                             | 10:4m/s-1mm n=3 |             | 3 mice      | W=0.796 df=3 P=0.105 | F=15.574 df=4 p=0.017                 |                            |                                               |                                  |         |
|                  |                             | 10:4m/s-2mm n=3 |             | 3 mice      | W=0.983 df=3 P=0.751 | F=0.912 df=4 p=0.394                  |                            |                                               |                                  |         |
|                  |                             | 20:4m/s-1mm n=3 |             | 3 mice      | W=0.987 df=3 P=0.784 |                                       |                            |                                               |                                  |         |
|                  |                             | 20:4m/s-2mm n=3 |             | 3 mice      | W=0.953 df=3 P=0.584 | F=2.394 df=4 p=0.197                  |                            |                                               |                                  |         |
|                  |                             | 30:4m/s-1mm n=3 |             | 3 mice      | W=0.793 df=3 P=0.098 |                                       |                            |                                               |                                  |         |
|                  |                             | 30:4m/s-2mm n=3 |             | 3 mice      | W=0.793 df=3 P=0.098 |                                       |                            |                                               |                                  |         |
| Figure 1E right  | Blood Flow Index (U)        | 0:5m/s-1mm n=3  | Mouse       | 3 mice      | W=0.911 df=3 P=0.422 | F=6.510 df=4 p=0.063                  | Repeated measurement ANOVA | $F_{\text{between group}}=21.526$ df1=1 df2=4 | $P_{\text{between group}}=0.01$  | *       |
|                  |                             | 0:5m/s-2mm n=3  |             | 3 mice      | W=0.369 df=3 P=0.087 |                                       |                            | $F_{\text{within group}}=8.946$ df1=3 df2=12  | $P_{\text{within group}}=0.002$  |         |
|                  |                             | 10:5m/s-1mm n=3 |             | 3 mice      | W=0.198 df=3 P=0.868 | F=0.006 df=4 p=0.94                   |                            |                                               |                                  |         |
|                  |                             | 10:5m/s-2mm n=3 |             | 3 mice      | W=0.198 df=3 P=0.870 |                                       |                            |                                               |                                  |         |
|                  |                             | 20:5m/s-1mm n=3 |             | 3 mice      | W=0.262 df=3 P=0.597 | F=0.245 df=4 p=0.647                  |                            |                                               |                                  |         |
|                  |                             | 20:5m/s-2mm n=3 |             | 3 mice      | W=0.209 df=3 P=0.823 |                                       |                            |                                               |                                  |         |
|                  |                             | 30:5m/s-1mm n=3 |             | 3 mice      | W=0.351 df=3 P=0.180 | F=1.085 df=4 p=0.356                  |                            |                                               |                                  |         |
|                  |                             | 30:5m/s-2mm n=3 |             | 3 mice      | W=0.295 df=3 P=0.450 |                                       |                            |                                               |                                  |         |
| Figure 1F left   | Difference value of BFI (U) | 3m/s-1mm n=3    | Mouse       | 3 mice      | W=0.898 df=3 P=0.378 | F=2.924 df1=1 df2=4 p=0.162           | Two-tailed unpaired t-test | t=2.413                                       | P=0.73                           | ns      |
|                  |                             | 3m/s-2mm n=3    |             | 3 mice      | W=0.861 df=3 P=0.269 |                                       |                            |                                               |                                  |         |
| Figure 2F middle | Difference value of BFI (U) | 4m/s-1mm n=3    | Mouse       | 3 mice      | W=0.979 df=3 P=0.722 | F=0.127 df1=1 df2=4 p=0.74            | Two-tailed unpaired t-test | t=4.392                                       | P=0.012                          | *       |
|                  |                             | 4m/s-2mm n=3    |             | 3 mice      | W=0.802 df=3 P=0.12  |                                       |                            |                                               |                                  |         |
| Figure 2F right  | Difference value of BFI (U) | 5m/s-1mm n=3    | Mouse       | 3 mice      | W=0.810 df=3 P=0.139 | F=3.078 df1=1 df2=4 p=0.154           | Two-tailed unpaired t-test | t=4.561                                       | P=0.01                           | *       |
|                  |                             | 5m/s-2mm n=3    |             | 3 mice      | W=0.931 df=3 P=0.494 |                                       |                            |                                               |                                  |         |
| Figure 1H left   | Blood Flow Index (U)        | 0:3m/s-1mm n=3  | Mouse       | 3 mice      | W=0.757 df=3 P=0.015 | F=4.389 df=4 p=0.104                  | Repeated measurement ANOVA | $F_{\text{between group}}=0.623$ df1=1 df2=4  | $P_{\text{between group}}=0.474$ | ns      |
|                  |                             | 0:3m/s-2mm n=3  |             | 3 mice      | W=0.987 df=3 P=0.784 |                                       |                            | $F_{\text{within group}}=11.465$ df1=3 df2=12 | $P_{\text{within group}}=0.001$  |         |
|                  |                             | 10:3m/s-1mm n=3 |             | 3 mice      | W=0.943 df=3 P=0.540 | F=0.041 df=4 p=0.849                  |                            |                                               |                                  |         |
|                  |                             | 10:3m/s-2mm n=3 |             | 3 mice      | W=0.999 df=3 P=0.934 |                                       |                            |                                               |                                  |         |
|                  |                             | 20:3m/s-1mm n=3 |             | 3 mice      | W=0.887 df=3 P=0.344 | F=1.081 df=4 p=0.496                  |                            |                                               |                                  |         |
|                  |                             | 20:3m/s-2mm n=3 |             | 3 mice      | W=0.851 df=3 P=0.244 |                                       |                            |                                               |                                  |         |
|                  |                             | 30:3m/s-1mm n=3 |             | 3 mice      | W=0.898 df=3 P=0.380 | F=1.332 df=4 p=0.879                  |                            |                                               |                                  |         |
|                  |                             | 30:3m/s-2mm n=3 |             | 3 mice      | W=0.956 df=3 P=0.597 |                                       |                            |                                               |                                  |         |
| Figure 1H middle | Blood Flow Index (U)        | 0:4m/s-1mm n=3  | Mouse       | 3 mice      | W=0.757 df=3 P=0.015 | F=0.002 df=4 p=0.966                  | Repeated measurement ANOVA | $F_{\text{between group}}=53.153$ df1=1 df2=4 | $P_{\text{between group}}=0.002$ | **      |
|                  |                             | 0:4m/s-2mm n=3  |             | 3 mice      | W=0.781 df=3 P=0.053 |                                       |                            | $F_{\text{within group}}=5.898$ df1=3 df2=12  | $P_{\text{within group}}=0.01$   |         |
|                  |                             | 10:4m/s-1mm n=3 |             | 3 mice      | W=0.998 df=3 P=0.925 | F=0.113 df=4 p=0.754                  |                            |                                               |                                  |         |
|                  |                             | 10:4m/s-2mm n=3 |             | 3 mice      | W=0.977 df=3 P=0.708 |                                       |                            |                                               |                                  |         |
|                  |                             | 20:4m/s-1mm n=3 |             | 3 mice      | W=0.976 df=3 P=0.702 | F=3.084 df=4 p=0.154                  |                            |                                               |                                  |         |
|                  |                             | 20:4m/s-2mm n=3 |             | 3 mice      | W=0.987 df=3 P=0.780 |                                       |                            |                                               |                                  |         |
|                  |                             | 30:4m/s-1mm n=3 |             | 3 mice      | W=0.793 df=3 P=0.097 | F=0.255 df=4 p=0.640                  |                            |                                               |                                  |         |
|                  |                             | 30:4m/s-2mm n=3 |             | 3 mice      | W=0.999 df=3 P=0.943 |                                       |                            |                                               |                                  |         |
| Figure 1H right  | Blood Flow Index (U)        | 0:5m/s-1mm n=3  | Mouse       | 3 mice      | W=0.999 df=3 P=0.932 | F=13.605 df=4 p=0.021                 | Friedman's M test          | $X^2=1.333$ df=1                              | P=0.248                          | ns      |
|                  |                             | 0:5m/s-2mm n=3  |             | 3 mice      | W=0.758 df=3 P=0.017 |                                       |                            |                                               |                                  |         |
|                  |                             | 10:5m/s-1mm n=3 |             | 3 mice      | W=0.775 df=3 P=0.057 | F=9.205 df=4 p=0.039                  |                            |                                               |                                  |         |
|                  |                             | 10:5m/s-2mm n=3 |             | 3 mice      | W=0.887 df=3 P=0.344 |                                       |                            |                                               |                                  |         |
|                  |                             | 20:5m/s-1mm n=3 |             | 3 mice      | W=0.907 df=3 P=0.407 | F=9.090 df=4 p=0.039                  |                            |                                               |                                  |         |
|                  |                             | 20:5m/s-2mm n=3 |             | 3 mice      | W=0.925 df=3 P=0.469 |                                       |                            |                                               |                                  |         |
|                  |                             | 30:5m/s-1mm n=3 |             | 3 mice      | W=0.995 df=3 P=0.807 | F=1.085 df=4 p=0.044                  |                            |                                               |                                  |         |

|                  |                                     |                 |              |                    |                       |                               |                                   |                                                                                                |                                                                       |         |
|------------------|-------------------------------------|-----------------|--------------|--------------------|-----------------------|-------------------------------|-----------------------------------|------------------------------------------------------------------------------------------------|-----------------------------------------------------------------------|---------|
|                  |                                     | 30:5m/s-2mm n=3 |              | 3 mice             | W=0.925 df=3 P=0.471  |                               |                                   |                                                                                                |                                                                       |         |
| Figure 1J left   | Blood Flow Index (U)                | 0:3m/s-1mm n=3  | Mouse        | 3 mice             | W=0.908 df=3 P=0.412  | F=2.486 df=4 p=0.190          | Friedman's M test                 | X <sup>2</sup> =1.333 df=1                                                                     | P=0.248                                                               | ns      |
|                  |                                     | 0:3m/s-2mm n=3  |              | 3 mice             | W=0.876 df=3 P=0.312  |                               |                                   |                                                                                                |                                                                       |         |
|                  |                                     | 10:3m/s-1mm n=3 |              | 3 mice             | W=0.833 df=3 P=0.196  | F=3.727 df=4 p=0.126          |                                   |                                                                                                |                                                                       |         |
|                  |                                     | 10:3m/s-2mm n=3 |              | 3 mice             | W=0.757 df=3 P=0.016  |                               |                                   |                                                                                                |                                                                       |         |
|                  |                                     | 20:3m/s-1mm n=3 |              | 3 mice             | W=0.847 df=3 P=0.233  | F=3.911 df=4 p=0.119          |                                   |                                                                                                |                                                                       |         |
|                  |                                     | 20:3m/s-2mm n=3 |              | 3 mice             | W=0.824 df=3 P=0.173  |                               |                                   |                                                                                                |                                                                       |         |
|                  |                                     | 30:3m/s-1mm n=3 |              | 3 mice             | W=0.763 df=3 P=0.029  | F=0.099 df=4 p=0.769          |                                   |                                                                                                |                                                                       |         |
|                  |                                     | 30:3m/s-2mm n=3 |              | 3 mice             | W=0.838 df=3 P=0.209  |                               |                                   |                                                                                                |                                                                       |         |
| Figure 1J middle | Blood Flow Index (U)                | 0:4m/s-1mm n=3  | Mouse        | 3 mice             | W=0.998 df=3 P=0.912  | F=9.4 df=4 p=0.037            | Friedman's M test                 | X <sup>2</sup> =3 df=1                                                                         | P=0.083                                                               | ns      |
|                  |                                     | 0:4m/s-2mm n=3  |              | 3 mice             | W=0.805 df=3 P=0.127  |                               |                                   |                                                                                                |                                                                       |         |
|                  |                                     | 10:4m/s-1mm n=3 |              | 3 mice             | W=0.993 df=3 P=0.845  | F=0.746 df=4 p=0.436          |                                   |                                                                                                |                                                                       |         |
|                  |                                     | 10:4m/s-2mm n=3 |              | 3 mice             | W=0.995 df=3 P=0.870  |                               |                                   |                                                                                                |                                                                       |         |
|                  |                                     | 20:4m/s-1mm n=3 |              | 3 mice             | W=0.939 df=3 P=0.522  | F=0.911 df=4 p=0.394          |                                   |                                                                                                |                                                                       |         |
|                  |                                     | 20:4m/s-2mm n=3 |              | 3 mice             | W=0.862 df=3 P=0.272  |                               |                                   |                                                                                                |                                                                       |         |
|                  |                                     | 30:4m/s-1mm n=3 |              | 3 mice             | W=0.969 df=3 P=0.661  | F=3.273 df=4 p=0.145          |                                   |                                                                                                |                                                                       |         |
|                  |                                     | 30:4m/s-2mm n=3 |              | 3 mice             | W=0.998 df=3 P=0.904  |                               |                                   |                                                                                                |                                                                       |         |
| Figure 1J right  | Blood Flow Index (U)                | 0:5m/s-1mm n=3  | Mouse        | 3 mice             | W=0.989 df=3 P=0.802  | F=0.035 df=4 p=0.862          | Repeated measurement ANOVA        | F <sub>between group</sub> =1.355 df1=1 df2=4<br>F <sub>within group</sub> =5.948 df1=3 df2=12 | P <sub>between group</sub> =0.309<br>P <sub>within group</sub> =0.010 | ns      |
|                  |                                     | 0:5m/s-2mm n=3  |              | 3 mice             | W=0.838 df=3 P=0.208  |                               |                                   |                                                                                                |                                                                       |         |
|                  |                                     | 10:5m/s-1mm n=3 |              | 3 mice             | W=0.946 df=3 P=0.552  | F=7.025 df=4 p=0.057          |                                   |                                                                                                |                                                                       |         |
|                  |                                     | 10:5m/s-2mm n=3 |              | 3 mice             | W=0.917 df=3 P=0.441  |                               |                                   |                                                                                                |                                                                       |         |
|                  |                                     | 20:5m/s-1mm n=3 |              | 3 mice             | W=0.827 df=3 P=0.181  | F=0.173 df=4 p=0.699          |                                   |                                                                                                |                                                                       |         |
|                  |                                     | 20:5m/s-2mm n=3 |              | 3 mice             | W=0.99 df=3 P=0.807   |                               |                                   |                                                                                                |                                                                       |         |
|                  |                                     | 30:5m/s-1mm n=3 |              | 3 mice             | W=0.947 df=3 P=0.557  | F=3.287 df=4 p=0.144          |                                   |                                                                                                |                                                                       |         |
|                  |                                     | 30:5m/s-2mm n=3 |              | 3 mice             | W=0.953 df=3 P=0.582  |                               |                                   |                                                                                                |                                                                       |         |
| Figure 2B        | Thickness of cortical swelling (μm) | 3m/s-1mm n=11   | Slice        | 11 slices / 3 mice | W=0.873 df=11 P=0.085 | F=2.514 df1=2 df2=28 p=0.099  | One-way ANOVA                     | F=230.590 df1=2 df2=28                                                                         | P<0.0001                                                              | ****    |
|                  |                                     | 4m/s-1mm n=10   |              | 10 slices / 3 mice | W=0.947 df=10 P=0.628 |                               |                                   |                                                                                                |                                                                       |         |
|                  |                                     | 5m/s-1mm n=10   |              | 10 slices / 3 mice | W=0.901 df=10 P=0.225 |                               |                                   |                                                                                                |                                                                       |         |
|                  |                                     | 3m/s vs 4m/s    |              |                    |                       |                               | Tukey's multiple comparisons test |                                                                                                | P<0.0001                                                              | ****    |
|                  |                                     | 4m/s vs 5m/s    |              |                    |                       |                               | Tukey's multiple comparisons test |                                                                                                | P<0.0001                                                              | ****    |
|                  |                                     | 3m/s vs 5m/s    |              |                    |                       |                               | Tukey's multiple comparisons test |                                                                                                | P<0.0001                                                              | ****    |
| Figure 2C        | Bleeding area (μm <sup>2</sup> )    | 3m/s-1mm n=10   | Slice        | 10 slices / 3 mice | W=0.650 df=10 P<0.000 | F=12.451 df1=2 df2=24 p<0.000 | Kruskal-Wallis H test             | H=17.762 df=2                                                                                  | P<0.0001                                                              | ****    |
|                  |                                     | 4m/s-1mm n=9    |              | 9 slices / 3 mice  | W=0.903 df=9 P=0.272  |                               |                                   |                                                                                                |                                                                       |         |
|                  |                                     | 5m/s-1mm n=10   |              | 10 slices / 3 mice | W=0.888 df=10 P=0.191 |                               |                                   |                                                                                                |                                                                       |         |
|                  |                                     |                 | 3m/s vs 4m/s |                    |                       |                               |                                   | Nemenyi multiple comparisons test                                                              |                                                                       | P=0.007 |
|                  |                                     | 4m/s vs 5m/s    |              |                    |                       |                               | Nemenyi multiple comparisons test |                                                                                                | P=1.02                                                                | ns      |
|                  |                                     | 3m/s vs 5m/s    |              |                    |                       |                               | Nemenyi multiple comparisons test |                                                                                                | P<0.0001                                                              | ****    |
| Figure 2D        | Cortex loss depth (μm)              | 3m/s-2mm n=10   | Slice        | 10 slices / 3 mice | W=0.885 df=10 P=0.148 | F=0.450 df1=2 df2=26 p=0.642  | One-way ANOVA                     | F=32.948 df1=2 df2=26                                                                          | P<0.0001                                                              | ****    |
|                  |                                     | 4m/s-2mm n=10   |              | 10 slices / 3 mice | W=0.927 df=10 P=0.415 |                               |                                   |                                                                                                |                                                                       |         |
|                  |                                     | 5m/s-2mm n=9    |              | 9 slices / 3 mice  | W=0.939 df=9 P=0.542  |                               |                                   |                                                                                                |                                                                       |         |
|                  |                                     | 3m/s vs 4m/s    |              |                    |                       |                               | Tukey's multiple comparisons test |                                                                                                | P=0.046                                                               | *       |
|                  |                                     | 4m/s vs 5m/s    |              |                    |                       |                               | Tukey's multiple comparisons test |                                                                                                | P<0.0001                                                              | ****    |
|                  |                                     | 3m/s vs 5m/s    |              |                    |                       |                               | Tukey's multiple comparisons test |                                                                                                | P<0.0001                                                              | ****    |
| Figure 2E        | Bleeding area (μm <sup>2</sup> )    | 3m/s-2mm n=10   | Slice        | 10 slices / 3 mice | W=0.986 df=10 P=0.988 | F=4.241 df1=2 df2=27 p=0.025  | Kruskal-Wallis H test             | H=17.159 df1=2 df2=27                                                                          | P<0.0001                                                              | ****    |
|                  |                                     | 4m/s-2mm n=10   |              | 10 slices / 3 mice | W=0.948 df=10 P=0.641 |                               |                                   |                                                                                                |                                                                       |         |
|                  |                                     | 5m/s-2mm n=10   |              | 10 slices / 3 mice | W=0.960 df=10 P=0.788 |                               |                                   |                                                                                                |                                                                       |         |
|                  |                                     | 3m/s vs 4m/s    |              |                    |                       |                               | Nemenyi multiple comparisons test |                                                                                                | P=0.422                                                               | ns      |

|                |                                  |              |        |             |                       |                              |                                   |                       |                                   |      |         |    |
|----------------|----------------------------------|--------------|--------|-------------|-----------------------|------------------------------|-----------------------------------|-----------------------|-----------------------------------|------|---------|----|
|                |                                  | 4m/s vs 5m/s |        |             |                       |                              | Nemenyi multiple comparisons test |                       | P=0.027                           | *    |         |    |
|                |                                  | 3m/s vs 5m/s |        |             |                       |                              | Nemenyi multiple comparisons test |                       | P<0.0001                          | **** |         |    |
| Figure 3D 3m/s | LF print area (cm <sup>2</sup> ) | Sham n=8     | Mouse  | 8 mice      | W=0.836 df=8 P=0.068  | F=0.494 df1=2 df2=19 p=0.618 | Kruskal-Wallis H test             | H=12.735 df1=2 df2=19 | P=0.002                           | **   |         |    |
|                |                                  | 1mm n=8      |        | 8 mice      | W=0.775 df=8 P=0.015  |                              |                                   |                       |                                   |      |         |    |
|                |                                  | 2mm n=6      |        | 6 mice      | W=0.937 df=6 P=0.638  |                              |                                   |                       |                                   |      |         |    |
|                |                                  | Sham vs 1mm  |        |             |                       |                              | Nemenyi multiple comparisons test |                       | P=0.644                           | ns   |         |    |
|                |                                  | Sham vs 2mm  |        |             |                       |                              | Nemenyi multiple comparisons test |                       | P=0.001                           | ***  |         |    |
|                |                                  | 1mm vs 2mm   |        |             |                       |                              | Nemenyi multiple comparisons test |                       | P=0.003                           | **   |         |    |
|                | LH print area (cm <sup>2</sup> ) | Sham n=8     | Mouse  | 8 mice      | W=0.973 df=8 P=0.921  | F=0.442 df1=2 df2=19 p=0.649 | One-way ANOVA                     | F=5.924 df1=2 df2=19  | P=0.01                            | **   |         |    |
|                |                                  | 1mm n=8      |        | 8 mice      | W=0.885 df=8 P=0.211  |                              |                                   |                       |                                   |      |         |    |
|                |                                  | 2mm n=6      |        | 6 mice      | W=0.934 df=6 P=0.615  |                              |                                   |                       |                                   |      |         |    |
|                |                                  | Sham vs 1mm  |        |             |                       |                              | Tukey's multiple comparisons test |                       | P=0.989                           | ns   |         |    |
|                |                                  | Sham vs 2mm  |        |             |                       |                              | Tukey's multiple comparisons test |                       | P=0.02                            | *    |         |    |
|                |                                  | 1mm vs 2mm   |        |             |                       |                              | Tukey's multiple comparisons test |                       | P=0.015                           | *    |         |    |
|                | RF print area (cm <sup>2</sup> ) | Sham n=8     | Mouse  | 8 mice      | W=0.928 df=8 P=0.498  | F=5.349 df1=2 df2=19 p=0.014 | Kruskal-Wallis H test             | H=12.522 df1=2 df2=19 | P=0.02                            | *    |         |    |
|                |                                  | 1mm n=8      |        | 8 mice      | W=0.966 df=8 P=0.868  |                              |                                   |                       |                                   |      |         |    |
|                |                                  | 2mm n=6      |        | 6 mice      | W=0.882 df=6 P=0.281  |                              |                                   |                       |                                   |      |         |    |
|                |                                  | Sham vs 1mm  |        |             |                       |                              | Nemenyi multiple comparisons test |                       | P=1                               | ns   |         |    |
|                |                                  | Sham vs 2mm  |        |             |                       |                              | Nemenyi multiple comparisons test |                       | P=0.005                           | ***  |         |    |
|                |                                  | 1mm vs 2mm   |        |             |                       |                              | Nemenyi multiple comparisons test |                       | P=0.005                           | ***  |         |    |
|                | RH print area (cm <sup>2</sup> ) | Sham n=8     | Neuron | 8 mice      | W=0.950 df=8 P=0.706  | F=2.351 df1=2 df2=19 p=0.122 | One-way ANOVA                     | F=8.743 df1=2 df2=19  | P=0.002                           | **   |         |    |
|                |                                  | 1mm n=8      |        | 8 mice      | W=0.850 df=10 P=0.095 |                              |                                   |                       |                                   |      |         |    |
|                |                                  | 2mm n=6      |        | 6 mice      | W=0.890 df=10 P=0.318 |                              |                                   |                       |                                   |      |         |    |
|                |                                  |              |        | Sham vs 1mm |                       |                              |                                   |                       | Tukey's multiple comparisons test |      | P=0.972 | ns |
|                |                                  |              |        | Sham vs 2mm |                       |                              |                                   |                       | Tukey's multiple comparisons test |      | P=0.005 | ** |
|                |                                  |              |        | 1mm vs 2mm  |                       |                              |                                   |                       | Tukey's multiple comparisons test |      | P=0.003 | ** |
| Figure 3D 4m/s | LF print area (cm <sup>2</sup> ) | Sham n=8     | Mouse  | 8 mice      | W=0.836 df=8 P=0.068  | F=0.245 df1=2 df2=19 p=0.785 | Kruskal-Wallis H test             | H=12.125 df1=2 df2=19 | P=0.002                           | **   |         |    |
|                |                                  | 1mm n=8      |        | 8 mice      | W=0.930 df=8 P=0.518  |                              |                                   |                       |                                   |      |         |    |
|                |                                  | 2mm n=6      |        | 6 mice      | W=0.762df=6 P=0.026   |                              |                                   |                       |                                   |      |         |    |
|                |                                  | Sham vs 1mm  |        |             |                       |                              | Nemenyi multiple comparisons test |                       | P=1                               | ns   |         |    |
|                |                                  | Sham vs 2mm  |        |             |                       |                              | Nemenyi multiple comparisons test |                       | P=0.004                           | **   |         |    |
|                |                                  | 1mm vs 2mm   |        |             |                       |                              | Nemenyi multiple comparisons test |                       | P=0.011                           | *    |         |    |
|                | LH print area (cm <sup>2</sup> ) | Sham n=8     | Mouse  | 8 mice      | W=0.973 df=8 P=0.921  | F=1.591 df1=2 df2=19 p=0.23  | One-way ANOVA                     | F=5.207 df1=2 df2=19  | P=0.016                           | **   |         |    |
|                |                                  | 1mm n=8      |        | 8 mice      | W=0.844 df=8 P=0.054  |                              |                                   |                       |                                   |      |         |    |
|                |                                  | 2mm n=6      |        | 6 mice      | W=0.978 df=6 P=0.939  |                              |                                   |                       |                                   |      |         |    |
|                |                                  | Sham vs 1mm  |        |             |                       |                              | Tukey's multiple comparisons test |                       | P=0.221                           | ns   |         |    |
|                |                                  | Sham vs 2mm  |        |             |                       |                              | Tukey's multiple comparisons test |                       | P=0.012                           | *    |         |    |
|                |                                  | 1mm vs 2mm   |        |             |                       |                              | Tukey's multiple comparisons test |                       | P=0.264                           | ns   |         |    |

|                |                                  |             |             |        |                      |                              |                                   |                                   |          |         |    |
|----------------|----------------------------------|-------------|-------------|--------|----------------------|------------------------------|-----------------------------------|-----------------------------------|----------|---------|----|
|                | RF print area (cm <sup>2</sup> ) | Sham n=8    | Mouse       | 8 mice | W=0.953 df=8 P=0.742 | F=0.000 df1=2 df2=19 p=1     | One-way ANOVA                     | F=35.089 df1=2 df2=19             | P<0.0001 | ****    |    |
|                |                                  | 1mm n=8     |             | 8 mice | W=0.936 df=8 P=0.569 |                              |                                   |                                   |          |         |    |
|                |                                  | 2mm n=6     |             | 6 mice | W=0.917 df=6 P=0.485 |                              |                                   |                                   |          |         |    |
|                |                                  | Sham vs 1mm |             |        |                      |                              | Tukey's multiple comparisons test |                                   | P=0.657  | ns      |    |
|                |                                  | Sham vs 2mm |             |        |                      |                              | Tukey's multiple comparisons test |                                   | P<0.0001 | ****    |    |
|                |                                  | 1mm vs 2mm  |             |        |                      |                              | Tukey's multiple comparisons test |                                   | P<0.0001 | ****    |    |
|                | RH print area (cm <sup>2</sup> ) | Sham n=8    | Neuron      | 8 mice | W=0.885 df=8 P=0.21  | F=0.5 df1=2 df2=19 p=0.614   | One-way ANOVA                     | F=6.981 df1=2 df2=19              | P =0.005 | **      |    |
|                |                                  | 1mm n=8     |             | 8 mice | W=0.957 df=8 P=0.781 |                              |                                   |                                   |          |         |    |
|                |                                  | 2mm n=6     |             | 6 mice | W=0.936 df=6 P=0.628 |                              |                                   |                                   |          |         |    |
|                |                                  |             | Sham vs 1mm |        |                      |                              |                                   | Tukey's multiple comparisons test |          | P=0.245 | ns |
|                |                                  |             | Sham vs 2mm |        |                      |                              |                                   | Tukey's multiple comparisons test |          | P=0.004 | ** |
|                |                                  |             | 1mm vs 2mm  |        |                      |                              |                                   | Tukey's multiple comparisons test |          | P=0.098 | ns |
| Figure 3D 5m/s | LF print area (cm <sup>2</sup> ) | Sham n=8    | Mouse       | 8 mice | W=0.836 df=8 P=0.068 | F=0.057 df1=2 df2=20 p=0.945 | One-way ANOVA                     | F=34.176 df1=2 df2=20             | P<0.0001 | ****    |    |
|                |                                  | 1mm n=8     |             | 8 mice | W=0.956 df=8 P=0.771 |                              |                                   |                                   |          |         |    |
|                |                                  | 2mm n=7     |             | 7 mice | W=0.905 df=7 P=0.362 |                              |                                   |                                   |          |         |    |
|                |                                  | Sham vs 1mm |             |        |                      |                              | Tukey's multiple comparisons test |                                   | P=0.119  | ns      |    |
|                |                                  | Sham vs 2mm |             |        |                      |                              | Tukey's multiple comparisons test |                                   | P<0.0001 | ****    |    |
|                |                                  | 1mm vs 2mm  |             |        |                      |                              | Tukey's multiple comparisons test |                                   | P<0.0001 | ****    |    |
|                | LH print area (cm <sup>2</sup> ) | Sham n=8    | Mouse       | 8 mice | W=0.973 df=8 P=0.921 | F=0.951 df1=2 df2=20 p=0.403 | One-way ANOVA                     | F=5.868 df1=2 df2=20              | P=0.010  | ***     |    |
|                |                                  | 1mm n=8     |             | 8 mice | W=0.846 df=8 P=0.088 |                              |                                   |                                   |          |         |    |
|                |                                  | 2mm n=7     |             | 7 mice | W=0.83 df=7 P=0.08   |                              |                                   |                                   |          |         |    |
|                |                                  | Sham vs 1mm |             |        |                      |                              | Tukey's multiple comparisons test |                                   | P=0.153  | ns      |    |
|                |                                  | Sham vs 2mm |             |        |                      |                              | Tukey's multiple comparisons test |                                   | P=0.007  | **      |    |
|                |                                  | 1mm vs 2mm  |             |        |                      |                              | Tukey's multiple comparisons test |                                   | P=0.297  | ns      |    |
|                | RF print area (cm <sup>2</sup> ) | Sham n=8    | Mouse       | 8 mice | W=0.953 df=8 P=0.742 | F=1.87 df1=2 df2=20 p=0.18   | One-way ANOVA                     | F=40.95 df1=2 df2=20              | P<0.0001 | ****    |    |
|                |                                  | 1mm n=8     |             | 8 mice | W=0.95 df=8 P=0.712  |                              |                                   |                                   |          |         |    |
|                |                                  | 2mm n=7     |             | 7 mice | W=0.89 df=7 P=0.274  |                              |                                   |                                   |          |         |    |
|                |                                  | Sham vs 1mm |             |        |                      |                              | Tukey's multiple comparisons test |                                   | P=0.066  | ns      |    |
|                |                                  | Sham vs 2mm |             |        |                      |                              | Tukey's multiple comparisons test |                                   | P<0.0001 | ****    |    |
|                |                                  | 1mm vs 2mm  |             |        |                      |                              | Tukey's multiple comparisons test |                                   | P<0.0001 | ****    |    |
|                | RH print area (cm <sup>2</sup> ) | Sham n=8    | Neuron      | 8 mice | W=0.885 df=8 P=0.21  | F=0.472 df1=2 df2=20 p=0.63  | One-way ANOVA                     | F=1.607 df1=2 df2=20              | P =0.225 | ns      |    |
|                |                                  | 1mm n=8     |             | 8 mice | W=0.83 df=8 P=0.059  |                              |                                   |                                   |          |         |    |
|                |                                  | 2mm n=7     |             | 7 mice | W=0.956 df=6 P=0.784 |                              |                                   |                                   |          |         |    |
| Figure 3E 3m/s | LF Meanintensity (U)             | Sham n=8    | Mouse       | 8 mice | W=0.988 df=8 P=0.992 | F=0.244 df1=2 df2=19 p=0.786 | One-way ANOVA                     | F=105.163 df1=2 df2=19            | P<0.0001 | ****    |    |
|                |                                  | 1mm n=8     |             | 8 mice | W=0.937 df=8 P=0.579 |                              |                                   |                                   |          |         |    |
|                |                                  | 2mm n=6     |             | 6 mice | W=0.798 df=6 P=0.057 |                              |                                   |                                   |          |         |    |
|                |                                  | Sham vs 1mm |             |        |                      |                              | Tukey's multiple comparisons test |                                   | P=0.977  | ns      |    |
|                |                                  | Sham vs 2mm |             |        |                      |                              | Tukey's multiple comparisons test |                                   | P<0.0001 | ****    |    |

|                |                      |             |             |        |                       |                              |                                   |                                   |          |         |     |
|----------------|----------------------|-------------|-------------|--------|-----------------------|------------------------------|-----------------------------------|-----------------------------------|----------|---------|-----|
|                |                      | 1mm vs 2mm  |             |        |                       |                              | Tukey's multiple comparisons test |                                   | P<0.0001 | ****    |     |
|                | LH Meanintensity (U) | Sham n=8    | Mouse       | 8 mice | W=0.774 df=8 P=0.015  | F=1.145 df1=2 df2=19 p=0.339 | Kruskal-Wallis H test             | H=12.528 df1=2 df2=19             | P=0.02   | *       |     |
|                |                      | 1mm n=8     |             | 8 mice | W=0.813 df=8 P=0.04   |                              |                                   |                                   |          |         |     |
|                |                      | 2mm n=6     |             | 6 mice | W=0.884 df=6 P=0.286  |                              |                                   |                                   |          |         |     |
|                |                      | Sham vs 1mm |             |        |                       |                              | Nemenyi multiple comparisons test |                                   | P=0.939  | ns      |     |
|                |                      | Sham vs 2mm |             |        |                       |                              | Nemenyi multiple comparisons test |                                   | P=0.02   | *       |     |
|                |                      | 1mm vs 2mm  |             |        |                       |                              | Nemenyi multiple comparisons test |                                   | P=0.02   | *       |     |
|                | RF Meanintensity (U) | Sham n=8    | Mouse       | 8 mice | W=0.863 df=8 P=0.128  | F=1.917 df1=2 df2=19 p=0.174 | One-way ANOVA                     | F=82.471 df1=2 df2=19             | P<0.0001 | ****    |     |
|                |                      | 1mm n=8     |             | 8 mice | W=0.921 df=8 P=0.441  |                              |                                   |                                   |          |         |     |
|                |                      | 2mm n=6     |             | 6 mice | W=0.858 df=6 P=0.182  |                              |                                   |                                   |          |         |     |
|                |                      | Sham vs 1mm |             |        |                       |                              | Tukey's multiple comparisons test |                                   | P=9.07   | ns      |     |
|                |                      | Sham vs 2mm |             |        |                       |                              | Tukey's multiple comparisons test |                                   | P<0.0001 | ****    |     |
|                |                      | 1mm vs 2mm  |             |        |                       |                              | Tukey's multiple comparisons test |                                   | P<0.0001 | ****    |     |
|                | RH Meanintensity (U) | Sham n=8    | Neuron      | 8 mice | W=0.949 df=8 P=0.700  | F=2.253 df1=2 df2=19 p=0.132 | One-way ANOVA                     | F=10.336 df1=2 df2=19             | P<0.0001 | **      |     |
|                |                      | 1mm n=8     |             | 8 mice | W=0.908 df=10 P=0.338 |                              |                                   |                                   |          |         |     |
|                |                      | 2mm n=6     |             | 6 mice | W=0.855 df=10 P=0.173 |                              |                                   |                                   |          |         |     |
|                |                      |             | Sham vs 1mm |        |                       |                              |                                   | Tukey's multiple comparisons test |          | P=0.923 | ns  |
|                |                      |             | Sham vs 2mm |        |                       |                              |                                   | Tukey's multiple comparisons test |          | P=0.001 | *** |
|                |                      |             | 1mm vs 2mm  |        |                       |                              |                                   | Tukey's multiple comparisons test |          | P=0.003 | **  |
| Figure 3E 4m/s | LF Meanintensity (U) | Sham n=8    | Mouse       | 8 mice | W=0.988 df=8 P=0.992  | F=0.854 df1=2 df2=19 p=0.441 | One-way ANOVA                     | F=78.305 df1=2 df2=19             | P<0.0001 | ****    |     |
|                |                      | 1mm n=8     |             | 8 mice | W=0.901 df=8 P=0.292  |                              |                                   |                                   |          |         |     |
|                |                      | 2mm n=6     |             | 6 mice | W=0.902 df=6 P=0.386  |                              |                                   |                                   |          |         |     |
|                |                      | Sham vs 1mm |             |        |                       |                              | Tukey's multiple comparisons test |                                   | P=0.954  | ns      |     |
|                |                      | Sham vs 2mm |             |        |                       |                              | Tukey's multiple comparisons test |                                   | P<0.0001 | ****    |     |

|                |                      |             |             |        |                       |                              |                                   |                                   |          |         |      |
|----------------|----------------------|-------------|-------------|--------|-----------------------|------------------------------|-----------------------------------|-----------------------------------|----------|---------|------|
|                |                      | 1mm vs 2mm  |             |        |                       |                              | Tukey's multiple comparisons test |                                   | P<0.0001 | ****    |      |
|                | LH Meanintensity (U) | Sham n=8    | Mouse       | 8 mice | W=0.774 df=8 P=0.015  | F=1.803 df1=2 df2=19 p=0.192 | Kruskal-Wallis H test             | H=82.471 df1=2 df2=19             | P<0.0001 | ****    |      |
|                |                      | 1mm n=8     |             | 8 mice | W=0.873 df=8 P=0.162  |                              |                                   |                                   |          |         |      |
|                |                      | 2mm n=6     |             | 6 mice | W=0.951 df=6 P=0.747  |                              |                                   |                                   |          |         |      |
|                |                      | Sham vs 1mm |             |        |                       |                              | Nemenyi multiple comparisons test |                                   | P=0.065  | ns      |      |
|                |                      | Sham vs 2mm |             |        |                       |                              | Nemenyi multiple comparisons test |                                   | P<0.0001 | ****    |      |
|                |                      | 1mm vs 2mm  |             |        |                       |                              | Nemenyi multiple comparisons test |                                   | P<0.023  | *       |      |
|                | RF Meanintensity (U) | Sham n=8    | Mouse       | 8 mice | W=0.863 df=8 P=0.128  | F=1.96 df1=2 df2=19 p=0.168  | One-way ANOVA                     | F=94.059 df1=2 df2=19             | P<0.0001 | ****    |      |
|                |                      | 1mm n=8     |             | 8 mice | W=0.985 df=8 P=0.982  |                              |                                   |                                   |          |         |      |
|                |                      | 2mm n=6     |             | 6 mice | W=0.954 df=6 P=0.772  |                              |                                   |                                   |          |         |      |
|                |                      | Sham vs 1mm |             |        |                       |                              | Tukey's multiple comparisons test |                                   | P=0.534  | ns      |      |
|                |                      | Sham vs 2mm |             |        |                       |                              | Tukey's multiple comparisons test |                                   | P<0.0001 | ****    |      |
|                |                      | 1mm vs 2mm  |             |        |                       |                              | Tukey's multiple comparisons test |                                   | P<0.0001 | ****    |      |
|                | RH Meanintensity (U) | Sham n=8    | Neuron      | 8 mice | W=0.949 df=8 P=0.700  | F=1.103 df1=2 df2=19 p=0.352 | One-way ANOVA                     | F=23.307 df1=2 df2=19             | P<0.0001 | ****    |      |
|                |                      | 1mm n=8     |             | 8 mice | W=0.877 df=10 P=0.177 |                              |                                   |                                   |          |         |      |
|                |                      | 2mm n=6     |             | 6 mice | W=0.952 df=10 P=0.757 |                              |                                   |                                   |          |         |      |
|                |                      |             | Sham vs 1mm |        |                       |                              |                                   | Tukey's multiple comparisons test |          | P=0.702 | ns   |
|                |                      |             | Sham vs 2mm |        |                       |                              |                                   | Tukey's multiple comparisons test |          | P=0.001 | **** |
|                |                      |             | 1mm vs 2mm  |        |                       |                              |                                   | Tukey's multiple comparisons test |          | P=0.001 | **** |
| Figure 3E 5m/s | LF Meanintensity (U) | Sham n=8    | Mouse       | 8 mice | W=0.988 df=8 P=0.992  | F=0.198 df1=2 df2=20 p=0.822 | One-way ANOVA                     | F=130.246 df1=2 df2=20            | P<0.0001 | ****    |      |
|                |                      | 1mm n=8     |             | 8 mice | W=0.944 df=8 P=0.653  |                              |                                   |                                   |          |         |      |
|                |                      | 2mm n=7     |             | 7 mice | W=0.940 df=7 P=0.636  |                              |                                   |                                   |          |         |      |
|                |                      | Sham vs 1mm |             |        |                       |                              | Tukey's multiple comparisons test |                                   | P=0.922  | ns      |      |
|                |                      | Sham vs 2mm |             |        |                       |                              | Tukey's multiple comparisons test |                                   | P<0.0001 | ****    |      |
|                |                      | 1mm vs 2mm  |             |        |                       |                              | Tukey's multiple comparisons test |                                   | P<0.0001 | ****    |      |
|                | LH Meanintensity (U) | Sham n=8    | Mouse       | 8 mice | W=0.774 df=8 P=0.015  | F=2.435 df1=2 df2=20 p=0.113 | Kruskal-Wallis H test             | H=14.136 df1=2 df2=20             | P=0.001  | ***     |      |
|                |                      | 1mm n=8     |             | 8 mice | W=0.977 df=8 P=0.948  |                              |                                   |                                   |          |         |      |
|                |                      | 2mm n=7     |             | 7 mice | W=0.975 df=7 P=0.931  |                              |                                   |                                   |          |         |      |
|                |                      | Sham vs 1mm |             |        |                       |                              | Nemenyi multiple comparisons test |                                   | P=0.712  | ns      |      |
|                |                      | Sham vs 2mm |             |        |                       |                              | Nemenyi multiple comparisons test |                                   | P=0.001  | ***     |      |
|                |                      | 1mm vs 2mm  |             |        |                       |                              | Nemenyi multiple comparisons test |                                   | P=0.002  | ***     |      |
|                | RF Meanintensity (U) | Sham n=8    | Mouse       | 8 mice | W=0.961 df=8 P=0.824  | F=1.033 df1=2 df2=20 p=0.374 | One-way ANOVA                     | F=110.733 df1=2 df2=20            | P<0.0001 | ****    |      |
|                |                      | 1mm n=8     |             | 8 mice | W=0.87 df=8 P=0.151   |                              |                                   |                                   |          |         |      |
|                |                      | 2mm n=7     |             | 7 mice | W=0.933 df=7 P=0.579  |                              |                                   |                                   |          |         |      |
|                |                      | Sham vs 1mm |             |        |                       |                              | Tukey's multiple comparisons test |                                   | P=0.515  | ns      |      |
|                |                      | Sham vs 2mm |             |        |                       |                              | Tukey's multiple comparisons test |                                   | P<0.0001 | ****    |      |
|                |                      | 1mm vs 2mm  |             |        |                       |                              | Tukey's multiple comparisons test |                                   | P<0.0001 | ****    |      |
|                |                      | Sham n=8    |             | 8 mice | W=0.949 df=8 P=0.700  |                              |                                   |                                   |          |         |      |



|                |                                  |             |       |        |                         |                                 |                                   |                        |            |      |
|----------------|----------------------------------|-------------|-------|--------|-------------------------|---------------------------------|-----------------------------------|------------------------|------------|------|
| Figure 3G 3m/s | Latency to fall (s)              | Sham n=6    | Mouse | 6 mice | W=0.805 df=6 P=0.065    | F=1.616 df1=2 df2=15 p=0.231    | Kruskal-Wallis H test             | H=1.275 df1=2 df2=15   | P =0.529   | ns   |
|                |                                  | 1mm n=6     |       | 6 mice | W=0.2 df=6 P=0.617      |                                 |                                   |                        |            |      |
|                |                                  | 2mm n=6     |       | 6 mice | W=0.2 df=6 P=0.506      |                                 |                                   |                        |            |      |
| Figure 3H 4m/s | Latency to fall (s)              | Sham n=6    | Mouse | 6 mice | W=0.805 df=6 P=0.065    | F=3.660 df1=2 df2=15 p=0.051    | One-way ANOVA                     | F=11.722 df1=2 df2=15  | P =0.00086 | ***  |
|                |                                  | 1mm n=6     |       | 6 mice | W=0.801 df=6 P=0.060    |                                 |                                   |                        |            |      |
|                |                                  | 2mm n=6     |       | 6 mice | W=0.792 df=6 P=0.050    |                                 |                                   |                        |            |      |
|                |                                  | Sham vs 1mm |       |        |                         |                                 | Tukey's multiple comparisons test |                        | P =0.0037  | **   |
|                |                                  | Sham vs 2mm |       |        |                         |                                 | Tukey's multiple comparisons test |                        | P=0.00134  | **   |
|                |                                  | 1mm vs 2mm  |       |        |                         |                                 | Tukey's multiple comparisons test |                        | P=0.865    | ns   |
| Figure 3I 5m/s | Latency to fall (s)              | Sham n=6    | Mouse | 6 mice | W=0.805 df=6 P=0.065    | F=7.408 df1=2 df2=15 p=0.006    | Kruskal-Wallis H test             | H=11.556 df1=2 df2=15  | P=0.003    | **   |
|                |                                  | 1mm n=6     |       | 6 mice | W=0.981 df=6 P=0.956    |                                 |                                   |                        |            |      |
|                |                                  | 2mm n=6     |       | 6 mice | W=0.942 df=6 P=0.677    |                                 |                                   |                        |            |      |
|                |                                  | Sham vs 1mm |       |        |                         |                                 | Nemenyi multiple comparisons test |                        | P=0.0068   | **   |
|                |                                  | Sham vs 2mm |       |        |                         |                                 | Nemenyi multiple comparisons test |                        | P=0.0017   | **   |
|                |                                  | 1mm vs 2mm  |       |        |                         |                                 | Nemenyi multiple comparisons test |                        | P=0.6653   | ns   |
| Figure 7B      | Mito area ( $\mu\text{m}^2$ )    | Sham n=56   | Mito  | 3 mice | W=0.824 df=56 P<0.0001  | F=15.939 df1=2 df2=190 p<0.0001 | Kruskal-Wallis H test             | H=7.951 df1=2 df2=190  | P=0.019    | **   |
|                |                                  | 1mm n=72    |       | 3 mice | W=0.854 df=72 P<0.0001  |                                 |                                   |                        |            |      |
|                |                                  | 2mm n=65    |       | 3 mice | W=0.894 df=65 P<0.0001  |                                 |                                   |                        |            |      |
|                |                                  | Sham vs 1mm |       |        |                         |                                 | Nemenyi multiple comparisons test |                        | P=0.049    | *    |
|                |                                  | Sham vs 2mm |       |        |                         |                                 | Nemenyi multiple comparisons test |                        | P=0.005    | **   |
|                |                                  | 1mm vs 2mm  |       |        |                         |                                 | Nemenyi multiple comparisons test |                        | P=0.272    | ns   |
| Figure 7C      | Mito perimeter ( $\mu\text{m}$ ) | Sham n=56   | Mito  | 3 mice | W=0.930 df=56 P=0.003   | F=13.153 df1=2 df2=190 p<0.0001 | Kruskal-Wallis H test             | H=10.917 df1=2 df2=190 | P=0.004    | **   |
|                |                                  | 1mm n=72    |       | 3 mice | W=0.951 df=72 P=0.007   |                                 |                                   |                        |            |      |
|                |                                  | 2mm n=65    |       | 3 mice | W=0.929 df=65 P=0.001   |                                 |                                   |                        |            |      |
|                |                                  | Sham vs 1mm |       |        |                         |                                 | Nemenyi multiple comparisons test |                        | P=0.01     | *    |
|                |                                  | Sham vs 2mm |       |        |                         |                                 | Nemenyi multiple comparisons test |                        | P=0.002    | **   |
|                |                                  | 1mm vs 2mm  |       |        |                         |                                 | Nemenyi multiple comparisons test |                        | P=0.747    | ns   |
| Figure 7D      | Mito circularity                 | Sham n=56   | Mito  | 3 mice | W=0.835 df=56 P<0.0001  | F=6.771 df1=2 df2=190 p=0.0014  | Kruskal-Wallis H test             | H=5.534 df1=2 df2=190  | P=0.063    | ns   |
|                |                                  | 1mm n=72    |       | 3 mice | W=0.855 df=72 P<0.0001  |                                 |                                   |                        |            |      |
|                |                                  | 2mm n=65    |       | 3 mice | W=0.853 df=65 P<0.0001  |                                 |                                   |                        |            |      |
| Figure 7E      | Vacuole area ( $\text{nm}^2$ )   | Sham n=160  | Mito  | 3 mice | W=0.791 df=160 P<0.0001 | F=30.086 df1=2 df2=545 p<0.0001 | Kruskal-Wallis H test             | H=42.963 df1=2 df2=545 | P<0.0001   | **** |
|                |                                  | 1mm n=196   |       | 3 mice | W=0.629 df=196 P<0.0001 |                                 |                                   |                        |            |      |
|                |                                  | 2mm n=192   |       | 3 mice | W=0.698 df=192 P<0.0001 |                                 |                                   |                        |            |      |
|                |                                  | Sham vs 1mm |       |        |                         |                                 | Nemenyi multiple comparisons test |                        | P=0.032    | *    |
|                |                                  | Sham vs 2mm |       |        |                         |                                 | Nemenyi multiple comparisons test |                        | P<0.0001   | **** |
|                |                                  | 1mm vs 2mm  |       |        |                         |                                 | Nemenyi multiple comparisons test |                        | P<0.0001   | **** |
| Figure 7F      | Vacuole perimeter (nm)           | Sham n=160  | Mito  | 3 mice | W=0.949 df=160 P<0.0001 | F=18.863 df1=2 df2=545 p<0.0001 | Kruskal-Wallis H test             | H=36.815 df1=2 df2=545 | P<0.0001   | **** |
|                |                                  | 1mm n=196   |       | 3 mice | W=0.902 df=196 P<0.0001 |                                 |                                   |                        |            |      |
|                |                                  | 2mm n=192   |       | 3 mice | W=0.801 df=192 P<0.0001 |                                 |                                   |                        |            |      |
|                |                                  | Sham vs 1mm |       |        |                         |                                 | Nemenyi multiple comparisons test |                        | P=0.024    | *    |
|                |                                  | Sham vs 2mm |       |        |                         |                                 | Nemenyi multiple comparisons test |                        | P<0.0001   | **** |
|                |                                  | 1mm vs 2mm  |       |        |                         |                                 | Nemenyi multiple comparisons test |                        | P<0.0001   | **** |
| Figure 7G      | Are ratio                        | Sham n=56   | Mito  | 3 mice | W=0.746 df=56 P<0.0001  | F=5.154 df1=2 df2=190 p=0.006   | Kruskal-Wallis H test             | H=40.664 df1=2 df2=190 | P<0.0001   | **** |
|                |                                  | 1mm n=72    |       | 3 mice | W=0.895 df=72 P<0.0001  |                                 |                                   |                        |            |      |
|                |                                  | 2mm n=65    |       | 3 mice | W=0.930 df=65 P<0.0001  |                                 |                                   |                        |            |      |
|                |                                  | Sham vs 1mm |       |        |                         |                                 | Nemenyi multiple comparisons test |                        | P=0.543    | ns   |
|                |                                  | Sham vs 2mm |       |        |                         |                                 | Nemenyi multiple comparisons test |                        | P<0.0001   | **** |
|                |                                  | 1mm vs 2mm  |       |        |                         |                                 | Nemenyi multiple comparisons test |                        | P<0.0001   | **** |
| Figure 8B      | Mito area ( $\mu\text{m}^2$ )    | Sham n=76   | Mito  | 3 mice | W=0.846 df=76 P<0.0001  | F=19.12 df1=2 df2=205 p<0.0001  | Kruskal-Wallis H test             | H=12.638 df1=2 df2=205 | P=0.002    | **   |
|                |                                  | 1mm n=68    |       | 3 mice | W=0.846 df=68 P<0.0001  |                                 |                                   |                        |            |      |
|                |                                  | 2mm n=64    |       | 3 mice | W=0.942 df=64 P<0.0001  |                                 |                                   |                        |            |      |
|                |                                  | Sham vs 1mm |       |        |                         |                                 | Nemenyi multiple comparisons test |                        | P=0.001    | **   |
|                |                                  | Sham vs 2mm |       |        |                         |                                 | Nemenyi multiple comparisons test |                        | P=0.073    | ns   |
|                |                                  | 1mm vs 2mm  |       |        |                         |                                 | Nemenyi multiple comparisons test |                        | P=0.035    | *    |
| Figure 8C      | Mito perimeter ( $\mu\text{m}$ ) | Sham n=76   | Mito  | 3 mice | W=0.938 df=76 P<0.0001  | F=13.329 df1=2 df2=205 p<0.0001 | Kruskal-Wallis H test             | H=12.050 df1=2 df2=205 | P=0.002    | **   |
|                |                                  | 1mm n=68    |       | 3 mice | W=0.851 df=68 P<0.0001  |                                 |                                   |                        |            |      |
|                |                                  | 2mm n=64    |       | 3 mice | W=0.977 df=64 P<0.0001  |                                 |                                   |                        |            |      |



|  |  |             |  |  |  |  |                                   |  |          |     |
|--|--|-------------|--|--|--|--|-----------------------------------|--|----------|-----|
|  |  | Sham vs 1mm |  |  |  |  | Nemenyi multiple comparisons test |  | P=0.0005 | *** |
|  |  | Sham vs 2mm |  |  |  |  | Nemenyi multiple comparisons test |  | P=0.224  | ns  |
|  |  | 1mm vs 2mm  |  |  |  |  | Nemenyi multiple comparisons test |  | P=0.034  | *   |

|           |                                 |             |       |        |                         |                                 |                                   |                        |          |      |
|-----------|---------------------------------|-------------|-------|--------|-------------------------|---------------------------------|-----------------------------------|------------------------|----------|------|
| Figure 8D | Mito circularity                | Sham n=76   | Mito  | 3 mice | W=0.830 df=76 P<0.0001  | F=2.707 df1=2 df2=205 p=0.069   | Kruskal-Wallis H test             | H=20.989 df1=2 df2=205 | P<0.0001 | **** |
|           |                                 | 1mm n=68    |       | 3 mice | W=0.902 df=68 P<0.0001  |                                 |                                   |                        |          |      |
|           |                                 | 2mm n=64    |       | 3 mice | W=0.843 df=64 P<0.0001  |                                 |                                   |                        |          |      |
|           |                                 | Sham vs 1mm |       |        |                         |                                 | nemenyi multiple comparisons test |                        | P=0.054  | ns   |
|           |                                 | Sham vs 2mm |       |        |                         |                                 | nemenyi multiple comparisons test |                        | P=0.013  | *    |
|           |                                 | 1mm vs 2mm  |       |        |                         |                                 | nemenyi multiple comparisons test |                        | P<0.0001 | **** |
| Figure 8E | Vacuole area (nm <sup>2</sup> ) | Sham n=189  | Mito  | 3 mice | W=0.536 df=189 P<0.0001 | F=15.133 df1=2 df2=624 p<0.0001 | Kruskal-Wallis H test             | H=19.139 df1=2 df2=624 | P<0.0001 | **** |
|           |                                 | 1mm n=221   |       | 3 mice | W=0.678 df=221 P<0.0001 |                                 |                                   |                        |          |      |
|           |                                 | 2mm n=217   |       | 3 mice | W=0.628 df=217 P<0.0001 |                                 |                                   |                        |          |      |
|           |                                 | Sham vs 1mm |       |        |                         |                                 | nemenyi multiple comparisons test |                        | P=0.563  | ns   |
|           |                                 | Sham vs 2mm |       |        |                         |                                 | nemenyi multiple comparisons test |                        | P<0.0001 | **** |
|           |                                 | 1mm vs 2mm  |       |        |                         |                                 | nemenyi multiple comparisons test |                        | P<0.0001 | **** |
| Figure 8F | Vacuole perimeter (nm)          | Sham n=189  | Mito  | 3 mice | W=0.717 df=189 P<0.0001 | F=7.233 df1=2 df2=624 p=0.0007  | Kruskal-Wallis H test             | H=22.307 df1=2 df2=624 | P<0.0001 | **** |
|           |                                 | 1mm n=221   |       | 3 mice | W=0.752 df=221 P<0.0001 |                                 |                                   |                        |          |      |
|           |                                 | 2mm n=217   |       | 3 mice | W=0.845 df=217 P<0.0001 |                                 |                                   |                        |          |      |
|           |                                 | Sham vs 1mm |       |        |                         |                                 | nemenyi multiple comparisons test |                        | P=0.333  | ns   |
|           |                                 | Sham vs 2mm |       |        |                         |                                 | nemenyi multiple comparisons test |                        | P<0.0001 | **** |
|           |                                 | 1mm vs 2mm  |       |        |                         |                                 | nemenyi multiple comparisons test |                        | P<0.0001 | **** |
| Figure 8G | Are ratio                       | Sham n=76   | Mito  | 3 mice | W=0.536 df=76 P<0.0001  | F=15.361 df1=2 df2=205 p<0.0001 | Kruskal-Wallis H test             | H=33.486 df1=2 df2=205 | P<0.0001 | **** |
|           |                                 | 1mm n=68    |       | 3 mice | W=0.583 df=68 P<0.0001  |                                 |                                   |                        |          |      |
|           |                                 | 2mm n=64    |       | 3 mice | W=0.749 df=64 P<0.0001  |                                 |                                   |                        |          |      |
|           |                                 | Sham vs 1mm |       |        |                         |                                 | nemenyi multiple comparisons test |                        | P=0.052  |      |
|           |                                 | Sham vs 2mm |       |        |                         |                                 | nemenyi multiple comparisons test |                        | P<0.0001 | **** |
|           |                                 | 1mm vs 2mm  |       |        |                         |                                 | nemenyi multiple comparisons test |                        | P=0.004  | **   |
| Figure 9B | Normal Mito (%)                 | Sham n=3    | Mouse | 3 mice | W=0.998 df=3 P=0.954    | F=2.584 df1=2 df2=6 p=0.155     | One-way ANOVA                     | F=40.376 df1=2 df2=6   | P<0.0001 | **** |
|           |                                 | 1mm n=3     |       | 3 mice | W=0.991 df=3 P=0.817    |                                 |                                   |                        |          |      |
|           |                                 | 2mm n=3     |       | 3 mice | W=0.993 df=3 P=0.836    |                                 |                                   |                        |          |      |
|           |                                 | Sham vs 1mm |       |        |                         |                                 | Tukey's multiple comparisons test |                        | P=0.001  | **   |
|           |                                 | Sham vs 2mm |       |        |                         |                                 | Tukey's multiple comparisons test |                        | P<0.0001 | **** |
|           |                                 | 1mm vs 2mm  |       |        |                         |                                 | Tukey's multiple comparisons test |                        | P=0.825  | ns   |
| Figure 9C | Reactive/degenerating Mito (%)  | 7d n=3      | Mouse | 3 mice | W=0.910 df=3 P=0.417    | F=2.295 df1=1 df2=4 P=0.204     | Two-tailed unpaired t-test        | t=-3.571               | P=0.023  | *    |
|           |                                 | 30d n=3     |       | 3 mice | W=0.997 df=3 P=0.903    |                                 |                                   |                        |          |      |
| Figure 9D | End-stage degenerating Mito (%) | 7d n=3      | Mouse | 3 mice | W=0.917 df=3 P=0.442    | F=0.133 df1=1 df2=4 P=0.734     | Two-tailed unpaired t-test        | t=4.102                | P=0.015  | *    |
|           |                                 | 30d n=3     |       | 3 mice | W=0.994 df=3 P=0.848    |                                 |                                   |                        |          |      |
